# Supplementary figures and images for: Transcriptomic and phenotypic analysis of murine embryonic stem cell derived BMP2+lineage cells: an insight into mesodermal patterning
Source: Springer Nature journal article supplement (doi:10.1186/gb-2007-8-9-r184), 2007-09-04

# RT-PCR analysis of differentiating EBs derived from BMP-2 ES cells

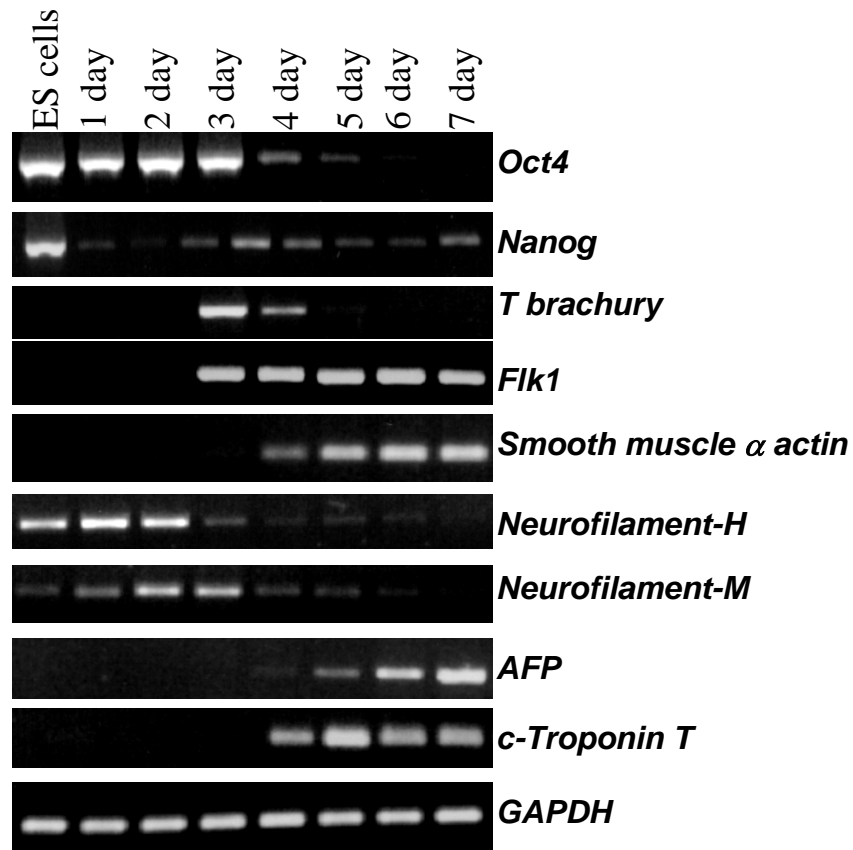

Additional data file 1

Supplement: Additional file 1 [file gb-2007-8-9-r184-s1.pdf]
